# Supplementary material for: Discovery of Highly Potent Tyrosinase Inhibitor, T1, with Significant Anti-Melanogenesis Ability by zebrafish in vivo Assay and Computational Molecular Modeling
Source: PubMed Central journal article supplement — Sci Rep. 2015 Jan 23;5:7995. doi: 10.1038/srep07995 (PMC4303873; doi:10.1038/srep07995), 2015-01-23
Supplement: srep07995-s1.pdf [file srep07995-s1.pdf]

# Supporting information

## Discovery of Highly Potent Tyrosinase Inhibitor, T1, with Significant Anti-Melanogenesis Ability by zebrafish *in vivo* Assay and Computational Molecular Modeling

*Wang-Chuan Chen*<sup>1,2</sup>, *Tien-Sheng Tseng*<sup>3,4</sup>, *Nai-Wan Hsiao*<sup>4</sup>, *Yun-Lian Lin*<sup>3</sup>, *Zhi-Hong Wen*<sup>5</sup>, *Chin-Chuan Tsai*<sup>1,2</sup>,  
*Yu-Ching Lee*<sup>6,7</sup>, *Hui-Hsiung Lin*<sup>3,4</sup>, *Keng-Chang Tsai*<sup>3\*</sup>

<sup>1</sup>The School of Chinese Medicine for Post Baccalaureate, I-Shou University, Kaohsiung, Taiwan.

<sup>2</sup>Department of Chinese Medicine, E-Da hospital, Kaohsiung, Taiwan.

<sup>3</sup>National Research Institute of Chinese Medicine, Ministry of Health and Welfare, Taipei, Taiwan.

<sup>4</sup>Institute of Biotechnology, National Changhua University of Education, Changhua, Taiwan.

<sup>5</sup>Department of Marine Biotechnology and Resources, National Sun Yat-sen University, Kaohsiung, Taiwan.

<sup>6</sup>Antibody and Hybridoma Core Facility, Taipei Medical University, Taipei, Taiwan.

<sup>7</sup>The Center of Translational Medicine, Taipei Medical University, Taipei, Taiwan.

### Corresponding Author

\* Address: National Research Institute of Chinese Medicine, No. 155-1, Sec. 2, Linong St., Beitou District, Taipei 11221, Taiwan; Tel: +886-2-2820-1999 ext.6241; Fax: +886-2-2823-6367; E-mail: tkc@nricm.edu.tw

**Table S1.** The IC<sub>50</sub> values of the compounds in cosmetics and known natural products retrieved from literatures.

| Compounds in Cosmetics                           | 2D Structure                                                                       | IC <sub>50</sub> (μM) | Ref |
|--------------------------------------------------|------------------------------------------------------------------------------------|-----------------------|-----|
| Hydroquinone                                     | 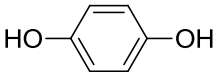 | 25.88                 | 1   |
| Kojic acid                                       |  | 40.69                 | 2   |
| Arbutin                                          |  | 368.93                | 2   |
| Azelaic acid                                     |  | >368.93               | 3   |
| Natural products                                 | Scientific name                                                                    | IC <sub>50</sub> (μM) | Ref |
| DBG                                              | <i>Lespedeza cyrtobotrya</i>                                                       | 20±3.5                | 4   |
| Oxyresveratrol                                   | <i>Mori cortex</i>                                                                 | 53.4                  | 5   |
| 1,2,3,6-Tetra- <i>O</i> -galloyl- β -D-glucose   | <i>Chinese Galls</i>                                                               | 30                    | 6   |
| 1,2,3,4,6-Penta- <i>O</i> -galloyl- β -D-glucose | <i>Chinese Galls</i>                                                               | 15                    | 6   |
| 2,3,4,6-Tetra- <i>O</i> -galloyl-D-glucose       | <i>Chinese Galls</i>                                                               | 54                    | 6   |
| Digallic acid                                    | <i>Chinese Galls</i>                                                               | >100                  | 6   |
| Methyl gallate                                   | <i>Chinese Galls</i>                                                               | >100                  | 6   |
| Gallic acid                                      | <i>Chinese Galls</i>                                                               | >100                  | 6   |
| Compound1                                        | <i>Lespedeza cyrtobotrya</i>                                                       | 5.2±3.9               | 7   |
| Compound2                                        | <i>Lespedeza cyrtobotrya</i>                                                       | 1321.7±4.1            | 7   |
| Compound3                                        | <i>Lespedeza cyrtobotrya</i>                                                       | 5±1.5                 | 7   |
| Compound4                                        | <i>Lespedeza cyrtobotrya</i>                                                       | 20±3.5                | 7   |
| N-feruloylserotonin                              | <i>Carthamus tinctorius L.</i>                                                     | 23                    | 8   |
| N-( <i>p</i> -coumaroyl)serotonin                | <i>Carthamus tinctorius L.</i>                                                     | 74                    | 8   |
| Acacetin                                         | <i>Carthamus tinctorius L.</i>                                                     | 779                   | 8   |
| Calycosin                                        | <i>Astragalus membranaceus</i>                                                     | 38.4±0.9              | 9   |
| Cinnamic acid                                    | <i>Cinnamomum cassia</i>                                                           | 693.2                 | 10  |
| Macelignan                                       | <i>Myristica fragrans</i>                                                          | 30                    | 11  |
| Melanocins A                                     | <i>Eupenicillium shearii</i>                                                       | 0.009                 | 12  |
| Melanocins B                                     | <i>Eupenicillium shearii</i>                                                       | >1000                 | 12  |
| Melanocins C                                     | <i>Eupenicillium shearii</i>                                                       | >1000                 | 12  |
| Gnetin C                                         | <i>Gnetum gnemon</i>                                                               | 7                     | 13  |
| Resveratrol                                      | <i>Gnetum gnemon</i>                                                               | 7.2                   | 13  |

|                    |                           |           |    |
|--------------------|---------------------------|-----------|----|
| Compund1           | <i>Amberboa ramosa</i>    | 1.36±0.1  | 14 |
| Compund2           | <i>Amberboa ramosa</i>    | 11.68±0.4 | 14 |
| Sophoraflavanone G | <i>Sophora flavescens</i> | 6.6       | 15 |
| Kuraridin          | <i>Sophora flavescens</i> | 0.6       | 15 |
| Kurarinone         | <i>Sophora flavescens</i> | 6.2       | 15 |

---

**Table S2. Evaluation of T1 toxicity in ICR mice via oral administration.**

| Sex  | Dose    | Mean body Weights During The Study Period(g) |              |              |
|------|---------|----------------------------------------------|--------------|--------------|
|      | (mg/kg) | SD1                                          | SD8          | SD15         |
| Male | 0       | 30.47 ± 0.66                                 | 34.68 ± 1.55 | 37.13 ± 0.88 |
|      | 1500    | 30.52 ± 0.98                                 | 34.67 ± 3.67 | 36.93 ± 2.69 |
|      | 3000    | 30.37 ± 0.69                                 | 35.48 ± 1.01 | 37.23 ± 1.09 |
|      | 6000    | 29.85 ± 0.93                                 | 35.90 ± 1.87 | 37.53 ± 1.78 |

  

| Sex  | Dose    | Body Weights Gains <sup>a</sup> (g) |             |
|------|---------|-------------------------------------|-------------|
|      | (mg/kg) | SD8                                 | SD15        |
| Male | 0       | 4.22 ± 1.35                         | 6.67 ± 0.52 |
|      | 1500    | 4.15 ± 2.89                         | 6.42 ± 2.01 |
|      | 3000    | 5.12 ± 0.89                         | 6.87 ± 1.00 |
|      | 6000    | 6.05 ± 1.35                         | 7.68 ± 1.20 |

<sup>a</sup>: Body weight (BW) gain was calculated from SD1

**Figure S1. Multiple sequences alignment of human and mushroom tyrosinases.** The sequence alignment was carried out by using Discovery Studio 4.0 alignment protocol. The amino acid sequence of mushroom tyrosinase (*Agaricus bisporus*) was retrieved from Protein Data Bank (PDB ID: 2Y9X, chain A) and the protein sequence of human tyrosinase (huTYR) was obtained from NCBI (NCBI Reference Sequence No: NP\_000363.1). The homology of sequence and secondary structure information were rendered by ESPrift program<sup>16</sup> (ESPrift - <http://esprift.ibcp.fr>). The numbering of residues and secondary structure elements (helices with squiggles, beta strands with arrows, turns and with TT letters) are presented according the sequence to of the *Agaricus bisporus* tyrosinase. The identical residues are highlighted by red sequence block, and the conserved residues are in red letters. The residues within 5Å near the dicopper ions in the active site are labeled with filled blue circle. The magenta stars denote the six highly conserved histidine residues. The white, cyan, and blue colors of the relative accessibility (acc) of each residue are buried, intermediate and accessible, respectively.

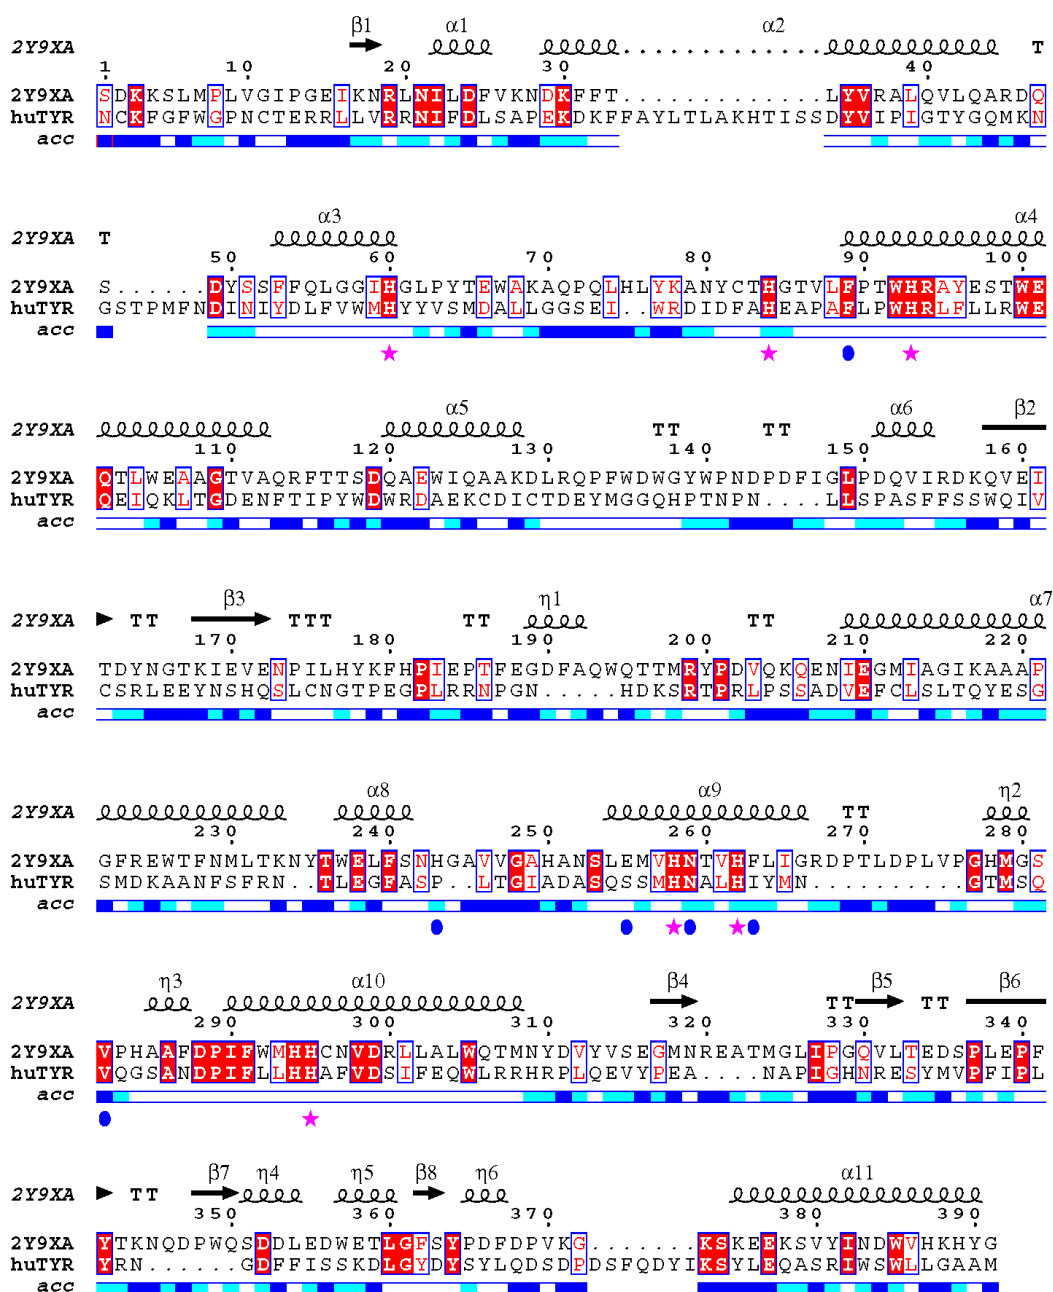

Figure S2. Dixon plot analysis of inhibition of mushroom tyrosinase. This analysis is used to determine the inhibition constant ( $K_i$ ) of the T1 molecule.

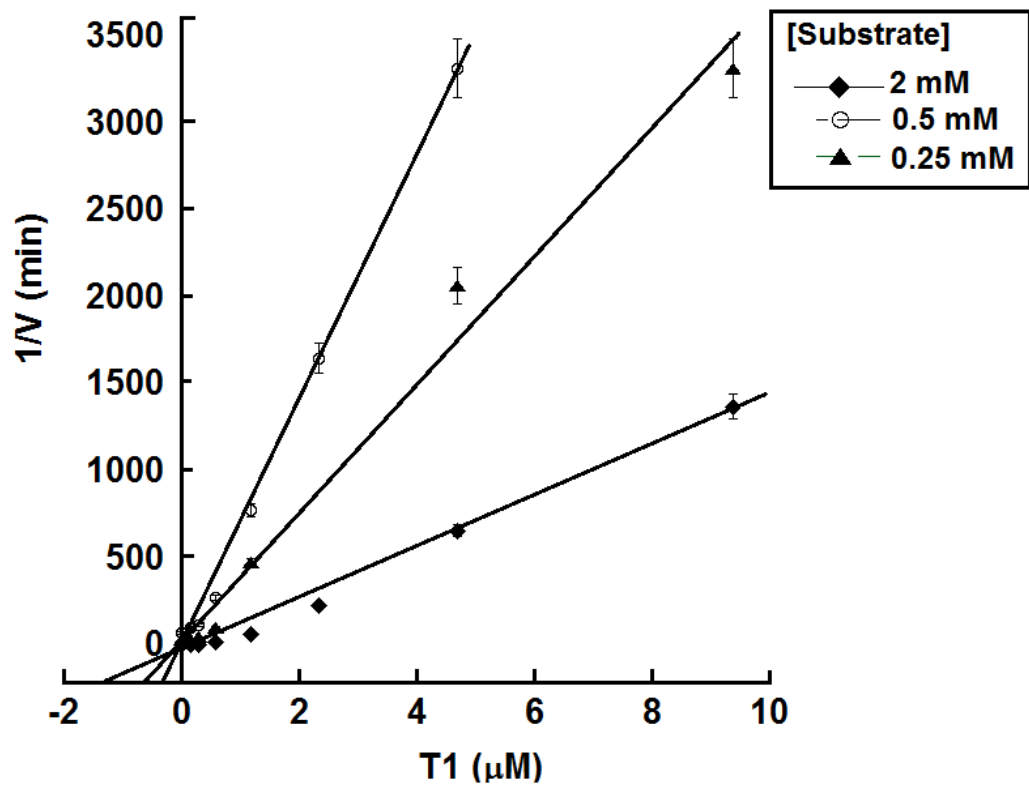

**Figure S3. Molecular docking analyses of T3 and T5 toward mushroom tyrosinase.** The green dash lines donate the hydrogen bond interactions, the yellow ones represent the hydrophobic interactions and the red spheres represent two cooper ions.

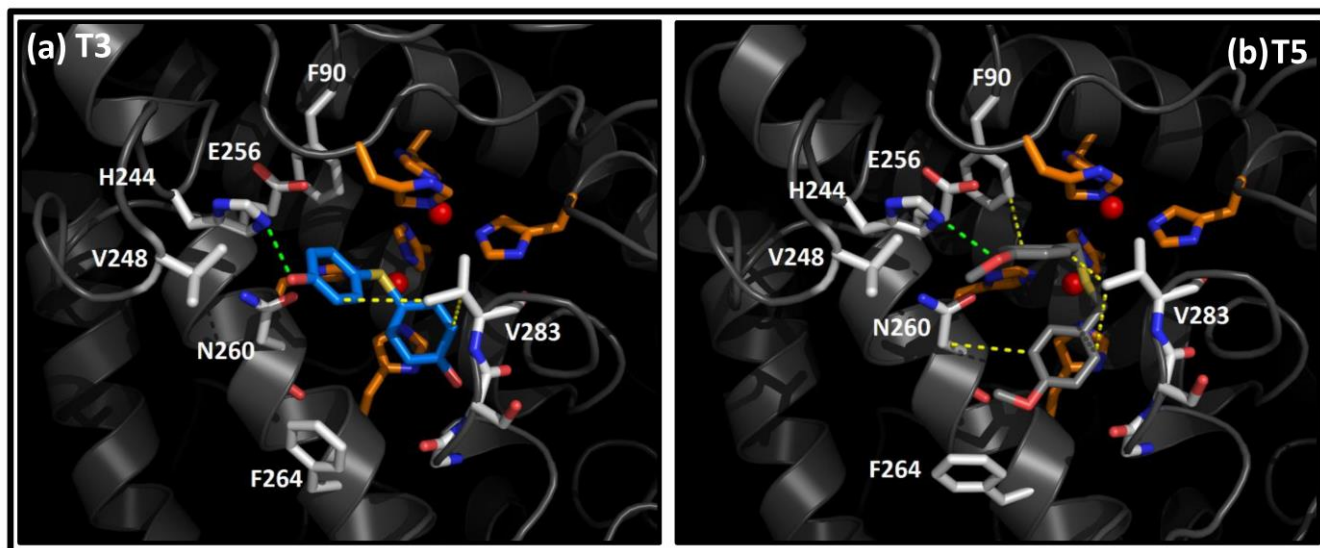

**Figure S4. Molecular docking analysis of T1 toward human tyrosinase.** The green dash lines donate the hydrogen bond interactions, the yellow ones represent the hydrophobic interactions and the red spheres represent two cooper ions.

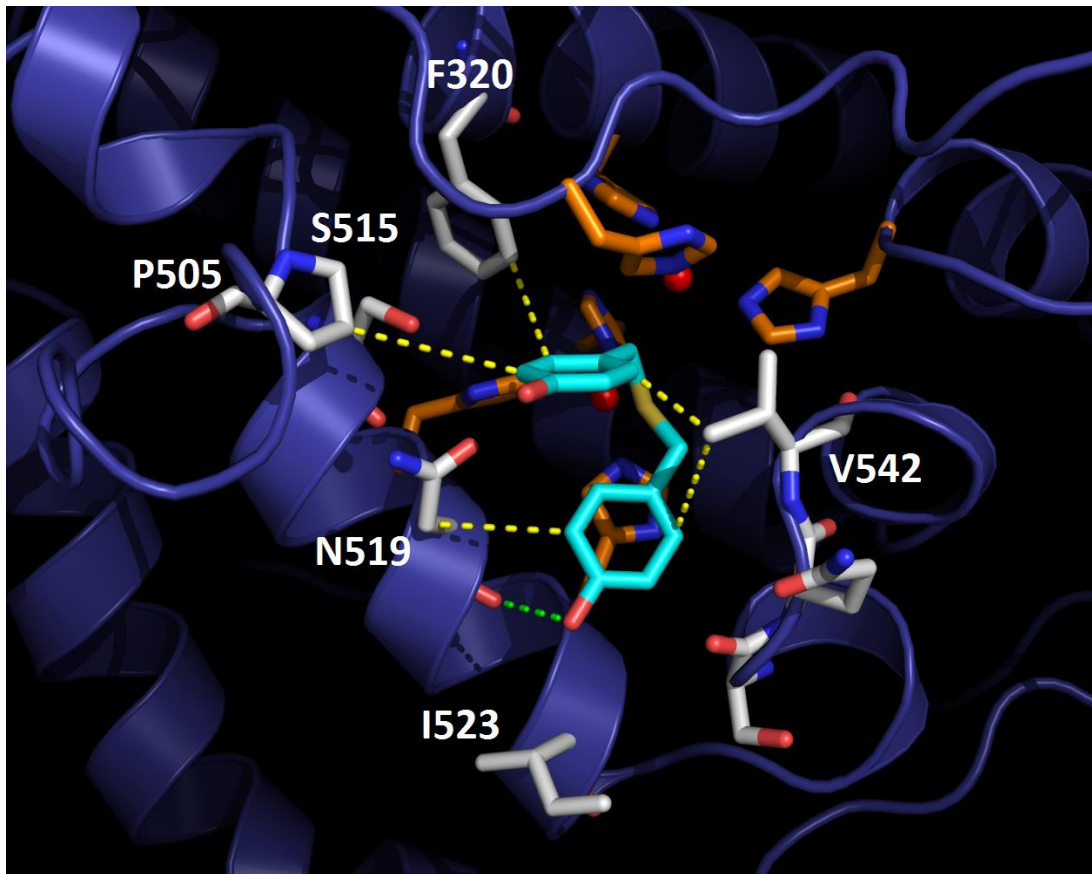



## REFERENCE

- 1 Marrero-Ponce, Y. *et al.* Prediction of tyrosinase inhibition activity using atom-based bilinear indices. *ChemMedChem* **2**, 449-478, doi:10.1002/cmdc.200600186 (2007).
- 2 Hsiao, N. W. *et al.* Serendipitous discovery of short peptides from natural products as tyrosinase inhibitors. *Journal of chemical information and modeling* **54**, 3099-3111, doi:10.1021/ci500370x (2014).
- 3 Sima, V. H. *et al.* Tyrosinase immobilized magnetic nanobeads for the amperometric assay of enzyme inhibitors: application to the skin whitening agents. *Talanta* **83**, 980-987, doi:10.1016/j.talanta.2010.11.005 (2011).
- 4 Baek, S. *et al.* Inhibitory effect of dalbergioidin isolated from the trunk of *Lespedeza cyrtobotrya* on melanin biosynthesis. *J Microbiol Biotechnol* **18**, 874-879 (2008).
- 5 Choi, S. Y. *et al.* (4-Methoxy-benzylidene)-(3-methoxy-phenyl)-amine, a nitrogen analog of stilbene as a potent inhibitor of melanin production. *Chem Pharm Bull (Tokyo)* **50**, 450-452 (2002).
- 6 Chen, L. G. *et al.* Melanogenesis inhibition by gallotannins from Chinese galls in B16 mouse melanoma cells. *Biol Pharm Bull* **32**, 1447-1452 (2009).
- 7 Lee, M. Y. *et al.* The melanin synthesis inhibition and radical scavenging activities of compounds isolated from the aerial part of *Lespedeza cyrtobotrya*. *J Microbiol Biotechnol* **20**, 988-994 (2010).
- 8 Roh, J. S., Han, J. Y., Kim, J. H. & Hwang, J. K. Inhibitory effects of active compounds isolated from safflower (*Carthamus tinctorius* L.) seeds for melanogenesis. *Biol Pharm Bull* **27**, 1976-1978 (2004).
- 9 Kim, J. H., Kim, M. R., Lee, E. S. & Lee, C. H. Inhibitory effects of calycosin isolated from the root of *Astragalus membranaceus* on melanin biosynthesis. *Biol Pharm Bull* **32**, 264-268 (2009).
- 10 Kong, Y. H. *et al.* Inhibitory effects of cinnamic acid on melanin biosynthesis in skin. *Biol Pharm Bull* **31**, 946-948 (2008).
- 11 Cho, Y., Kim, K. H., Shim, J. S. & Hwang, J. K. Inhibitory effects of macelignan isolated from *Myristica fragrans* HOUTT. on melanin biosynthesis. *Biol Pharm Bull* **31**, 986-989 (2008).
- 12 Kim, J. P. *et al.* Melanocins A, B and C, new melanin synthesis inhibitors produced by *Eupenicillium shearii*. I. Taxonomy, fermentation, isolation and biological properties. *J Antibiot (Tokyo)* **56**, 993-999 (2003).
- 13 Yanagihara, M. *et al.* Inhibitory effect of gnetin C, a resveratrol dimer from melinjo (*Gnetum gnemon*), on tyrosinase activity and melanin biosynthesis. *Biol Pharm Bull* **35**, 993-996 (2012).
- 14 Khan, S. B. *et al.* Tyrosinase-inhibitory long-chain esters from *Amberboa ramosa*. *Chem Pharm Bull (Tokyo)* **53**, 86-89 (2005).
- 15 Kim, S. J., Son, K. H., Chang, H. W., Kang, S. S. & Kim, H. P. Tyrosinase inhibitory prenylated flavonoids from *Sophora flavescens*. *Biol Pharm Bull* **26**, 1348-1350 (2003).
- 16 Gouet, P., Robert, X. & Courcelle, E. ESPript/ENDscript: Extracting and rendering sequence and 3D information from atomic structures of proteins. *Nucleic acids research* **31**, 3320-3323 (2003).
